# Supplementary material
Source: PubMed Central journal article supplement (PMC3433102)
Supplement: ajcr0002-0508-f6.pdf [file ajcr0002-0508-f6.pdf]

## ajcr0000132 SupplementaryTables

## Supplementary Table 1.

## Proteins at the crossroad of proliferation and differentiation (Figure 2)

## Interaction with the microenvironment

| Protein | Normal function                                                                                                                                                                                                                                                                                | Alteration in AML                                                          | Implication for the leukemic cell cycle                                            | References |
|---------|------------------------------------------------------------------------------------------------------------------------------------------------------------------------------------------------------------------------------------------------------------------------------------------------|----------------------------------------------------------------------------|------------------------------------------------------------------------------------|------------|
| Jak2    | non-receptor tyrosine kinase involved in cytokine signaling; Jak2 is indirectly activated by erythropoietin (EPO), IL-3, granulocyte-macrophage- and granulocyte-colony stimulating factor (GM-CSF and G-CSF), IL-6, thrombopoietin (TPO), growth hormone (GH), interferon gamma and prolactin | activating mutation                                                        | faster progression into S-phase                                                    | [127, 128] |
| Flt3    | receptor tyrosine kinase involved in expansion of early progenitors; activated by Flt3 ligand                                                                                                                                                                                                  | activating mutation, overexpression and altered intracellular distribution | faster progression into S-phase                                                    | [129, 130] |
| c-Kit   | receptor tyrosine kinase involved in expansion of early progenitors; activated by Kit ligand alias stem cell factor (SCF)                                                                                                                                                                      | activating mutation                                                        | faster progression into S-phase                                                    | [131]      |
| CXCR4   | chemokine receptor responsible for interaction with the bone marrow niche                                                                                                                                                                                                                      | upregulated in some cases                                                  | cytoprotection through anchoring in the hematopoietic niche and enhanced expansion | [132]      |

## Signal Transduction

| Protein   | Normal function                                                                                   | Alteration in AML                            | Implication for the leukemic cell cycle                         | References |
|-----------|---------------------------------------------------------------------------------------------------|----------------------------------------------|-----------------------------------------------------------------|------------|
| Ras       | small GTPase which, in the GTP-bound state, activates several downstream effectors such as PI3K   | N-ras and K-ras mutations                    | enhanced proliferation                                          | [133]      |
| Raf       | serine/threonine kinase involved in the MAPK/ERK signaling pathway                                | <i>BRAF</i> mutations                        | enhanced proliferation                                          | [134]      |
| MEK       | serine/threonine kinase involved in the MAPK/ERK signaling pathway                                | constitucional activation                    | enhanced proliferation                                          | [135]      |
| MAPK/ ERK | serine/threonine kinase which is critical for the synthesis of promitotic and proliferative genes | constitucional activation and overexpression | enhanced proliferation                                          | [135]      |
| Pim1      | serine/threonine kinase involved in cytokine signaling                                            | overexpression                               | faster progression into S-phase and thus enhanced proliferation | [136]      |

## Cell cycle control in acute myeloid leukemia

### Cdk inhibitors (CKIs)

| Protein | Normal function                                                     | Alteration in AML                      | Implication for the leukemic cell cycle | References |
|---------|---------------------------------------------------------------------|----------------------------------------|-----------------------------------------|------------|
| p14     | inhibitor of Mdm2 which leads to stabilization of p53 and hence p21 | downregulated                          | faster progression into S-phase         | [137]      |
| p15     | inhibitor of Cdk 4                                                  | downregulated                          | faster progression into S-phase         | [138]      |
| p16     | inhibitor of Cdk 4                                                  | downregulated                          | faster progression into S-phase         | [139]      |
| p21     | inhibitor of Cdk2 and 4                                             | p21 deficiency cooperates with t(8;21) | faster progression into S-phase         | [140]      |
| p27     | inhibitor of Cdk2 and 4                                             | downregulated                          | faster progression into S-phase         | [141]      |

### Regulators of DNA synthesis

| Protein | Normal function                                                                                    | Alteration in AML | Implication for the leukemic cell cycle           | References |
|---------|----------------------------------------------------------------------------------------------------|-------------------|---------------------------------------------------|------------|
| Tet2    | methylcytosine dehydroxymethyltransferase which catalyzes the synthesis of 5-hydroxymethylcytosine | mutated           | enhanced expansion of myeloid progenitors in mice | [38]       |

### Regulators of APC/C-dependent proteolysis

| Protein | Normal function                                                                        | Alteration in AML | Implication for the leukemic cell cycle | References |
|---------|----------------------------------------------------------------------------------------|-------------------|-----------------------------------------|------------|
| Cdh1    | activating subunit of the APC/C which is active primarily in late mitosis and G1 phase | repressed         | faster progression into S-phase         | [63]       |

### Pocket proteins

| Protein | Normal function                                                            | Alteration in AML              | Implication for the leukemic cell cycle | References |
|---------|----------------------------------------------------------------------------|--------------------------------|-----------------------------------------|------------|
| pRb     | pocket protein which binds to E2F and inhibits E2F-dependent transcription | downregulated and/or truncated | faster progression into S-phase         | [142]      |

### Cyclin-dependent kinases

| Protein | Normal function                                                                                         | Alteration in AML                                                                        | Implication for the leukemic cell cycle | References |
|---------|---------------------------------------------------------------------------------------------------------|------------------------------------------------------------------------------------------|-----------------------------------------|------------|
| Cdk4/6  | serine/threonine kinases which are activated by cyclin D and phosphorylate pRb and are inhibited by p16 | downstream target of many activating kinase mutations and deregulated signaling cascades | faster progression into S-phase         | [143]      |

## Cell cycle control in acute myeloid leukemia

|      |                                                                                             |                   |                                 |       |
|------|---------------------------------------------------------------------------------------------|-------------------|---------------------------------|-------|
| Cdk2 | serine/threonine kinase which is activated by cyclin E or A and is inhibited by p21 and p27 | enhanced activity | faster progression into S-phase | [144] |
|------|---------------------------------------------------------------------------------------------|-------------------|---------------------------------|-------|

### Cyclins

| Protein  | Normal function                                                 | Alteration in AML               | Implication for the leukemic cell cycle | References |
|----------|-----------------------------------------------------------------|---------------------------------|-----------------------------------------|------------|
| Cyclin D | activates Cdk4/6 is highly important for cell cycle progression | upregulated (e.g. MLL leukemia) | faster progression into S-phase         | [51]       |
| Cyclin E | activates Cdk2 regulates the G1/S transition                    | upregulated                     | faster progression into S-phase         | [144, 145] |

### Transcription factors

| Protein       | Normal function                                                                                                                                                                                                                                          | Alteration in AML                                                                          | Implication for the leukemic cell cycle                                           | References |
|---------------|----------------------------------------------------------------------------------------------------------------------------------------------------------------------------------------------------------------------------------------------------------|--------------------------------------------------------------------------------------------|-----------------------------------------------------------------------------------|------------|
| E2F           | family of transcription factors involved in cell cycle regulation and DNA synthesis                                                                                                                                                                      |                                                                                            | upregulated expression counteracts differentiation in vitro                       | [55, 146]  |
| p53           | transcription factor involved in DNA damage response and subsequent inhibition of cell cycle progression                                                                                                                                                 | deleted and/or mutated, deletion is often associated with mutation of the remaining allele | reduced checkpoint activity and compromised DNA damage response                   | [121]      |
| c-Myb         | member of the myeloblastosis family of transcription factors which is involved in the regulation of hematopoiesis                                                                                                                                        | upregulated (e.g. in MLL leukemia)                                                         | important player in MLL-leukemogenesis                                            | [39]       |
| PU.1          | ETS domain transcription factor encoded by the <i>SPI1</i> gene which is important for myeloid and B-cell development                                                                                                                                    | reduced PU.1 activity in some leukemia subsets                                             | suppression enhances pro-proliferative potential and leukemogenesis               | [147]      |
| Stat3         | signal transducer and activator of transcription in response to cytokines                                                                                                                                                                                | aberrant activation in AML                                                                 | faster progression into S-phase                                                   | [148]      |
| Stat5         | signal transducer and activator of transcription in response to cytokines; the Stat pathway is activated by various cytokines (IL-2, -3, -5, -6, -7, -12, -15), prolactin, tumor necrosis factor alpha, epidermal growth factor and interferon- $\gamma$ | aberrant activation in AML                                                                 | faster progression into S-phase                                                   | [25, 149]  |
| CEBP $\alpha$ | CCAAT/enhancer binding protein alpha is a basic leucine zipper transcription factor which can interact with Cdks                                                                                                                                         | mutated                                                                                    | inhibition of granulocytic differentiation                                        | [150]      |
| HoxA9         | homeobox transcription factor which is important for embryonic development                                                                                                                                                                               | aberrant transcription of Hox genes by MLL                                                 | enhances pro-proliferative potential and leukemogenesis in cooperation with Meis1 | [151]      |

## Cell cycle control in acute myeloid leukemia

|       |                                                                     |                                                                                                        |                                                            |                |
|-------|---------------------------------------------------------------------|--------------------------------------------------------------------------------------------------------|------------------------------------------------------------|----------------|
| Meis1 | homeobox transcription factor which is important during development | aberrant expression in Hox- and MLL-induced leukemia, cooperation with Evi1 and regulator of cyclin D3 | faster progression into S-phase and enhanced proliferation | [51, 152, 153] |
|-------|---------------------------------------------------------------------|--------------------------------------------------------------------------------------------------------|------------------------------------------------------------|----------------|

### Chromatin remodelers

| Protein | Normal function                                                                                                      | Alteration in AML                                           | Implication for the leukemic cell cycle     | References |
|---------|----------------------------------------------------------------------------------------------------------------------|-------------------------------------------------------------|---------------------------------------------|------------|
| MLL     | Histone-lysine N-methyltransferase<br>HRX is an important regulator of gene transcription and transcriptional memory | regulator of the Hox gene cluster and cell cycle regulators | faster progression into S-phase and mitosis | [46]       |

## Cell cycle control in acute myeloid leukemia

### Supplementary Table 2.

#### Proteins during S-phase - replicating the leukemia genome (Figure 3)

##### Checkpoint kinases

| Protein | Normal function                                                                                                                       | Alteration in AML                                                                     | Implication for the leukemic cell cycle                                          | References        |
|---------|---------------------------------------------------------------------------------------------------------------------------------------|---------------------------------------------------------------------------------------|----------------------------------------------------------------------------------|-------------------|
| ATM     | ataxia teleangiectasia mutated is a serine/threonine kinase which is activated by double strand breaks                                | mutations are described in lymphoid malignancy                                        | weakened checkpoint allows enhanced proliferation                                | [154, 155]        |
| ATR     | ataxia teleangiectasia and Rad3 related is a serine/threonine kinase which is activated by DNA damage                                 | regulator of MLL and mediator of arsen-trioxide-induced apoptosis                     | weakened checkpoint allows enhanced proliferation                                | [74, 75, 156-159] |
|         |                                                                                                                                       | mediates response to nucleoside analogs, such as cytarabine and clofarabine           | S-phase arrest in the presence of nucleoside analogs                             |                   |
|         |                                                                                                                                       | mediates response to topoisomerase II inhibitors such as etoposide during replication | S-phase arrest in the presence of topoisomerase II inhibitors, such as etoposide |                   |
| Chk1    | serine/threonine kinase which adds an inhibitory phosphate to Cdc25 to prevent activation of Cdk1 in response to DNA damage           | repression in some cases of Fanconi anemia with higher risk of transformation         | weakened checkpoint allows enhanced proliferation                                | [97]              |
| Chk2    | serine/threonine kinase which adds an inhibitory phosphate to Cdc25 to prevent activation of Cdk1 in response to double strand breaks | mutations and deletions may occur as rare events in myelodysplasia and AML            | weakening of the DNA damage response                                             | [160]             |

##### DNA damage response regulators

| Protein | Normal function                      | Alteration in AML                         | Implication for the leukemic cell cycle           | References |
|---------|--------------------------------------|-------------------------------------------|---------------------------------------------------|------------|
| Claspin | regulator of the DNA damage response | differential regulation in AML cell lines | modulation of strength of the DNA damage response | [98]       |

##### Phosphatases

| Protein | Normal function | Alteration in AML | Implication for the leukemic cell cycle | References |
|---------|-----------------|-------------------|-----------------------------------------|------------|
|         |                 |                   |                                         |            |

## Cell cycle control in acute myeloid leukemia

|        |                                                                                                                                           |                                                                             |                                                     |            |
|--------|-------------------------------------------------------------------------------------------------------------------------------------------|-----------------------------------------------------------------------------|-----------------------------------------------------|------------|
| Cdc25A | dual-specificity phosphatase which removes phosphate groups from tyrosine and serine/threonine residues and activates Cdk1, Cdk2 and Cdk4 | negatively regulated by Chk1 and Chk2 and positively regulated by Jak2V617F | enhanced G1/S transitioning and S-phase progression | [161, 162] |
|--------|-------------------------------------------------------------------------------------------------------------------------------------------|-----------------------------------------------------------------------------|-----------------------------------------------------|------------|

### F-box proteins

| Protein | Normal function                                                         | Alteration in AML                                                      | Implication for the leukemic cell cycle                          | References |
|---------|-------------------------------------------------------------------------|------------------------------------------------------------------------|------------------------------------------------------------------|------------|
| Skp2    | F-box protein activates the SCF and mediates proteolysis of p27 and MLL | overexpressed in many cancers and aberrantly regulated in MLL-leukemia | enhanced G1/S transitioning and weakening of DNA damage response | [75, 163]  |

### Cyclins

| Protein  | Normal function                                                        | Alteration in AML                                    | Implication for the leukemic cell cycle     | References |
|----------|------------------------------------------------------------------------|------------------------------------------------------|---------------------------------------------|------------|
| Cyclin E | activates Cdk2 regulates the G1/S transition                           | overexpressed                                        | faster progression into and through S-phase | [145]      |
| Cyclin A | activates Cdk2, regulates S-phase progression and interacts with c-Myb | overexpressed and altered intracellular distribution | faster progression through S-phase          | [164-166]  |

### Cyclin-dependent kinases

| Protein | Normal function                                                                             | Alteration in AML  | Implication for the leukemic cell cycle     | References |
|---------|---------------------------------------------------------------------------------------------|--------------------|---------------------------------------------|------------|
| Cdk2    | serine/threonine kinase which is activated by cyclin E or A and is inhibited by p21 and p27 | high Cdk2 activity | faster progression into and through S-phase | [144]      |

### Chromatin remodelers

| Protein | Normal function                                                                                        | Alteration in AML                                         | Implication for the leukemic cell cycle | References |
|---------|--------------------------------------------------------------------------------------------------------|-----------------------------------------------------------|-----------------------------------------|------------|
| MLL     | histone modifier and target of ATR which protects damaged chromatin from replication machinery binding | disrupted by leukemogenic translocations in MLL leukemias | weakened DNA damage response            | [75]       |

### Regulators of replication

| Protein | Normal function | Alteration in AML | Implication for the leukemic cell cycle | References |
|---------|-----------------|-------------------|-----------------------------------------|------------|
|---------|-----------------|-------------------|-----------------------------------------|------------|

## Cell cycle control in acute myeloid leukemia

---

|       |                                                   |                            |                                                    |       |
|-------|---------------------------------------------------|----------------------------|----------------------------------------------------|-------|
| Cdc45 | important regulator of early steps of replication | regulated by wild-type MLL | altered regulation of DNA binding in MLL-leukemias | [144] |
|-------|---------------------------------------------------|----------------------------|----------------------------------------------------|-------|

## Cell cycle control in acute myeloid leukemia

**Supplementary Table 3.**

**Proteins during G2-phase - getting prepared for genomic and cytoplasmic division (Figure 4)**

**Histones**

| Protein        | Normal function                                                                                   | Alteration in AML                                         | Implication for the leukemic cell cycle                                       | References |
|----------------|---------------------------------------------------------------------------------------------------|-----------------------------------------------------------|-------------------------------------------------------------------------------|------------|
| $\gamma$ -H2AX | histone which following phosphorylation at serine 139 is an indicator of DNA double strand breaks | differences in $\gamma$ -H2AX loading between AML subsets | Part of the DNA damage response and possible predictor of response to therapy | [96]       |

**Chromatin remodelers**

| Protein | Normal function                                                                             | Alteration in AML           | Implication for the leukemic cell cycle | References |
|---------|---------------------------------------------------------------------------------------------|-----------------------------|-----------------------------------------|------------|
| SET     | inhibitor of PP2A (see above) which is able to interact with p21 and inhibits cyclin B/Cdk1 | aberrantly expressed in AML | weakened DNA damage response            | [167]      |

**Ubiquitin ligases**

| Protein | Normal function                                   | Alteration in AML                    | Implication for the leukemic cell cycle | References |
|---------|---------------------------------------------------|--------------------------------------|-----------------------------------------|------------|
| Mdm2    | E3 ubiquitin ligase that negatively regulates p53 | overexpressed in some subsets of AML | inactivation of the p53-pathway         | [168]      |

**Checkpoint kinases**

| Protein | Normal function                                                                                                             | Alteration in AML                                                             | Implication for the leukemic cell cycle | References      |
|---------|-----------------------------------------------------------------------------------------------------------------------------|-------------------------------------------------------------------------------|-----------------------------------------|-----------------|
| ATM     | ataxia teleangiectasia mutated is a serine/threonine kinase which is activated by double strand breaks                      | mediates response to chemotherapy                                             | G2-arrest in response to chemotherapy   | [154, 155, 169] |
| ATR     | ataxia teleangiectasia and Rad3 related is a serine/threonine kinase which is activated by DNA damage                       | mediates response to chemotherapy                                             | G2-arrest in response to chemotherapy   | [75, 156, 170]  |
| Chk1    | serine/threonine kinase which adds an inhibitory phosphate to Cdc25 to prevent activation of Cdk1 in response to DNA damage | repression in some cases of Fanconi anemia with higher risk of transformation | weakened G2-checkpoint                  | [97]            |

## Cell cycle control in acute myeloid leukemia

|      |                                                                                                                                       |                                                                            |                        |       |
|------|---------------------------------------------------------------------------------------------------------------------------------------|----------------------------------------------------------------------------|------------------------|-------|
| Chk2 | serine/threonine kinase which adds an inhibitory phosphate to Cdc25 to prevent activation of Cdk1 in response to double strand breaks | mutations and deletions may occur as rare events in myelodysplasia and AML | weakened G2-checkpoint | [160] |
|------|---------------------------------------------------------------------------------------------------------------------------------------|----------------------------------------------------------------------------|------------------------|-------|

### DNA repair proteins

| Protein | Normal function                                                               | Alteration in AML     | Implication for the leukemic cell cycle | References |
|---------|-------------------------------------------------------------------------------|-----------------------|-----------------------------------------|------------|
| BRCA1/2 | breast cancer type 1 and 2 susceptibility proteins are involved in DNA repair | deleterious mutations | DNA damage response                     | [91]       |

### Phosphatases

| Protein | Normal function                                                                                                            | Alteration in AML                               | Implication for the leukemic cell cycle | References |
|---------|----------------------------------------------------------------------------------------------------------------------------|-------------------------------------------------|-----------------------------------------|------------|
| PP2A    | protein phosphatase 2 is a serine/threonine phosphatase which functions in DNA damage response and cell cycle progression  | frequently inactivated                          | weakened DNA damage response            | [167]      |
| Cdc25B  | dual-specificity phosphatase which removes phosphate groups from tyrosine and serine/threonine residues and activates Cdk1 | upregulated as a result of FoxM1 overexpression | faster transition into mitosis          | [171]      |

### Cyclin-dependent kinases

| Protein | Normal function                                                          | Alteration in AML             | Implication for the leukemic cell cycle | References |
|---------|--------------------------------------------------------------------------|-------------------------------|-----------------------------------------|------------|
| Cdk1    | cyclin-dependent kinase which is an important regulator of mitotic entry | aberrantly activated by Cdc25 | faster transition into mitosis          | [172]      |

### Cyclins

| Protein  | Normal function                       | Alteration in AML                      | Implication for the leukemic cell cycle | References |
|----------|---------------------------------------|----------------------------------------|-----------------------------------------|------------|
| Cyclin B | activates Cdk1 at the G2/M-transition | increased expression in AML cell lines | faster transition into mitosis          | [171]      |

### Mitotic kinases

| Protein | Normal function | Alteration in AML | Implication for the leukemic cell cycle | References |
|---------|-----------------|-------------------|-----------------------------------------|------------|
|---------|-----------------|-------------------|-----------------------------------------|------------|

## Cell cycle control in acute myeloid leukemia

|      |                                                                                         |                                 |                                                                             |            |
|------|-----------------------------------------------------------------------------------------|---------------------------------|-----------------------------------------------------------------------------|------------|
| Plk1 | polo-like kinase 1 is a regulator of mitotic entry, centrosome kinetics and cytokinesis | overexpressed in subsets of AML | faster recovery from DNA damage response and rapid progression into mitosis | [101, 123] |
|------|-----------------------------------------------------------------------------------------|---------------------------------|-----------------------------------------------------------------------------|------------|

### Transcription factors

| Protein | Normal function                                                                                                                                                                                                   | Alteration in AML               | Implication for the leukemic cell cycle | References |
|---------|-------------------------------------------------------------------------------------------------------------------------------------------------------------------------------------------------------------------|---------------------------------|-----------------------------------------|------------|
| FOXM1   | member of the Fox family of transcription factors with peak levels in G2 phase and mitosis and functions during mitotic entry and chromosome separation; positive regulator of various proto-oncogenic components | overexpressed in subsets of AML | faster progression into mitosis         | [171]      |

### Cdk inhibitors

| Protein | Normal function                                                                                                                        | Alteration in AML               | Implication for the leukemic cell cycle | References |
|---------|----------------------------------------------------------------------------------------------------------------------------------------|---------------------------------|-----------------------------------------|------------|
| p21     | Cdk-inhibitor (see above) which, complexed with SET or following upregulation by p53, can inhibit cyclin B/Cdk1 to block mitotic entry | downregulated in subsets of AML | faster progression into mitosis         | [171]      |

## Cell cycle control in acute myeloid leukemia

### Supplementary Table 4.

#### Proteins during G2-mitosis - segregating leukemia chromosomes and cytokinesis of leukemia cells (Figure 5)

##### Chromatin remodelers

| Protein | Normal function                                                                                                             | Alteration in AML                                                           | Implication for the leukemic cell cycle | References |
|---------|-----------------------------------------------------------------------------------------------------------------------------|-----------------------------------------------------------------------------|-----------------------------------------|------------|
| MLL     | chromatin modifying enzyme (see above) which is supposed to mark gene promoters to avoid transient silencing during mitosis | oligomerization mediated by the septin moiety of MLL-septin fusion proteins | enhanced chromatin remodeling           | [173]      |
| MLL5    | chromatin modifying enzyme which contributes to regulation of the G2/M-transition                                           | frequently deleted                                                          | altered entry into mitosis              | [174, 175] |

##### Cyclins

| Protein  | Normal function               | Alteration in AML                                                                                                                | Implication for the leukemic cell cycle | References |
|----------|-------------------------------|----------------------------------------------------------------------------------------------------------------------------------|-----------------------------------------|------------|
| Cyclin B | activates Cdk1 during mitosis | downregulated in the presence of truncated forms of AML1-ETO, reduced stability in the presence of a weakened mitotic checkpoint | faster metaphase to anaphase transition | [107]      |

##### Separase inhibitors

| Protein | Normal function                                   | Alteration in AML                                                                                                                | Implication for the leukemic cell cycle | References |
|---------|---------------------------------------------------|----------------------------------------------------------------------------------------------------------------------------------|-----------------------------------------|------------|
| Securin | inhibitor of the cohesin-cleaving enzyme separase | downregulated in the presence of truncated forms of AML1-ETO, reduced stability in the presence of a weakened mitotic checkpoint | less stringent inhibition of separase   | [107]      |

##### Spindle assembly checkpoint components

| Protein | Normal function                                                                       | Alteration in AML    | Implication for the leukemic cell cycle | References |
|---------|---------------------------------------------------------------------------------------|----------------------|-----------------------------------------|------------|
| BubR1   | member of the mitotic checkpoint complex (MCC) and pseudosubstrate inhibitor of Cdc20 | downregulated in AML | weakens the mitotic checkpoint response | [107]      |
| Bub1    | important regulator of MCC assembly and direct inhibitor of Cdc20                     | downregulated in AML | weakens the mitotic checkpoint response | [108]      |

## Cell cycle control in acute myeloid leukemia

|         |                                                                                                                                                                                        |                                                                                                         |                                                                                          |       |
|---------|----------------------------------------------------------------------------------------------------------------------------------------------------------------------------------------|---------------------------------------------------------------------------------------------------------|------------------------------------------------------------------------------------------|-------|
| Mad2    | member of the mitotic checkpoint complex (MCC) which inactivates Cdc20 through direct binding                                                                                          | Downregulated by Runx1 and the Etv6-Runx1 fusion protein, which is frequently observed in childhood ALL | weakens the mitotic checkpoint response                                                  | [176] |
| Blinkin | this protein mediates localization of Bub1 and BubR1 to conserved kinetochore components (hMIS12, NDC80, and Zwint-1 complexes) to facilitate stable chromatid microtubule connections | fusion protein partner of MLL                                                                           | the fusion protein probably causes a dominant negative effect over the wild type protein | [110] |

### Mitotic kinases

| Protein  | Normal function                                                                                                                        | Alteration in AML    | Implication for the leukemic cell cycle                                                  | References |
|----------|----------------------------------------------------------------------------------------------------------------------------------------|----------------------|------------------------------------------------------------------------------------------|------------|
| Aurora A | mitotic kinase which is important for proper function of the mitotic spindle, chromosome alignment and cytokinesis                     | overexpressed in AML | overrides the mitotic checkpoint                                                         | [112]      |
| Aurora B | chromosomal passenger protein which is important for chromosome attachment to microtubules                                             | overexpressed in AML | hyperactivation of Aurora B is known to cause chromosomal missegregation                 | [116, 177] |
| Plk1     | Plk1 is a mitotic kinase that regulates centrosome maturation, mitotic entry, spindle formation, chromosome separation and cytokinesis | overexpressed in AML | overexpression causes aberrant entry and exit from mitosis and contributes to aneuploidy | [123, 178] |
